# Supplementary material
Source: PubMed Central journal article supplement (PMC4829914)
Supplement: NIHMS767260-supplement-Supplemental_Table_1.pdf [file NIHMS767260-supplement-Supplemental_Table_1.pdf]

Supplemental Table. Spearman correlations of measures of executive function, behavioral, and social-emotional functioning, as reported by mothers and teachers (n=1037)

| <i>Teacher-reported outcomes</i> | <i>Parent-reported outcomes</i> |                                   |                     |                        |                              |
|----------------------------------|---------------------------------|-----------------------------------|---------------------|------------------------|------------------------------|
|                                  | Global Executive Composite      | BRIEF Behavioral Regulation Index | Metacognition Index | SDQ Total difficulties | SDQ Prosocial behavior scale |
| <b>BRIEF</b>                     |                                 |                                   |                     |                        |                              |
| Global Executive Composite       |                                 |                                   |                     |                        |                              |
| Behavioral Regulation Index      | 0.33                            |                                   |                     |                        |                              |
| Metacognition Index              | 0.29                            | 0.30                              |                     |                        |                              |
| <b>SDQ</b>                       |                                 |                                   |                     |                        |                              |
| Total difficulties               | 0.31                            | 0.20                              | 0.36                |                        |                              |
| Prosocial behavior scale         | 0.34                            | 0.27                              | 0.34                | 0.42                   |                              |
|                                  | -0.21                           | -0.17                             | -0.20               | -0.23                  | 0.27                         |

BRIEF is Behavioral Rating Inventory of Executive Function. BRIEF scores are standardized to mean 50 and standard deviation (SD) 10, with higher scores representing greater executive function problems. SDQ is Strengths and Difficulties Questionnaire. On the total difficulties scale, higher scores represent more difficulties (possible scores, 0-40). On the prosocial scale, higher scores represent more favorable prosocial behavior (possible scores, 0-10).
